# Supplementary material for: Predictors of functional status and disability among patients living with chronic kidney diseases at St Paul’s hospital millennium medical college, Ethiopia: findings from a cross-sectional study
Source: PubMed Central journal article supplement — BMC Nephrol. 2024 Oct 10;25:343. doi: 10.1186/s12882-024-03783-9 (PMC11468188; doi:10.1186/s12882-024-03783-9), 2024-10-10
Supplement: 12882_2024_3783_MOESM1_ESM.pdf [file 12882_2024_3783_MOESM1_ESM.pdf]

# Questionnaire: Self-reported disability among people with Chronic Kidney Disease [St Paul's Hospital Millennium Medical College, Ethiopia]

Questionnaire unique ID \_\_\_\_\_, Date of recording: \_\_\_\_\_ Time: \_\_\_\_\_

General instruction: Circle your choice among the alternatives; write a correct response on blank space for those questions which needs specification.

## Part one: Socio-demographic factors

| Code | Questions                                       | Response                                                                                        | Remark |
|------|-------------------------------------------------|-------------------------------------------------------------------------------------------------|--------|
| SD1  | Sex                                             | 1. Male      2. Female                                                                          |        |
| SD2  | How old are you?                                | .....in years                                                                                   |        |
| SD3  | Marital status                                  | 1. Married      2. Single<br>3. Divorce      4. widowed<br>5. Separated      6. Cohabitated     |        |
| SD4  | Weight                                          | ..... Kg                                                                                        |        |
| SD5  | Height                                          | In .....m      .....cm                                                                          |        |
| SD6  | What is your level of education?                | 1. No education<br>2. Primary school<br>3. Secondary school<br>4. College and above             |        |
| SD 7 | Please select your current occupational status? | 1. Farmer/ Dabor job<br>2. Professional/ Clerical<br>3. Own business<br>4. Unemployment/retired |        |

## Part two: Behavioral factors

|       |                                                              |                                                |  |
|-------|--------------------------------------------------------------|------------------------------------------------|--|
| BH1   | Do you smoke cigarettes at some time in your life?           | 1. No      2. Yes<br>If you say yes, go to BH2 |  |
| BH2   | How many cigarettes a day do you smoke or smoked?            | Number.....                                    |  |
| BH3   | Do you drink alcohols at some time in your life?             | 1. No      2. Yes                              |  |
| BH4   | Did you perform any physical activity?                       | 1. No      2. Yes                              |  |
| BH4.1 | If you say yes for question BH4 how many minute in per week? | .....min                                       |  |

**Part three: Questions related musculoskeletal disorders**

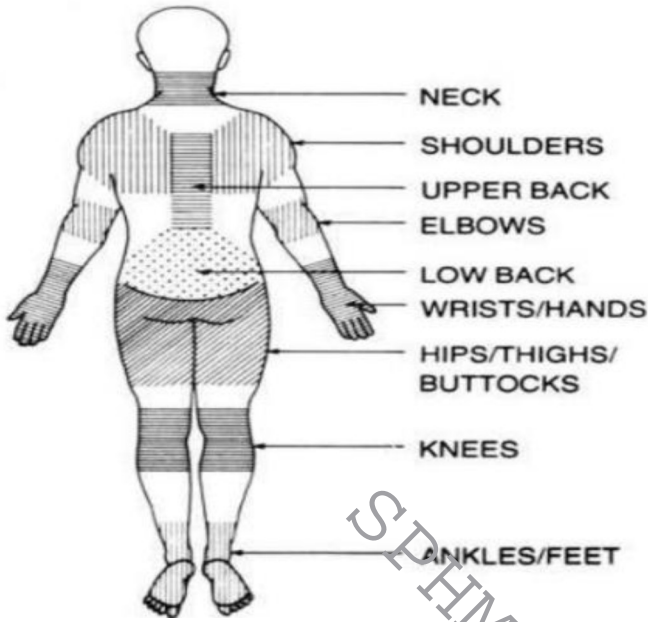

**Please tick if other MSK manifestations present (multiple responses possible)**

Joint pain

Joint swelling

Extremity swelling

Tenosynovitis

Muscle cramps

**Figure 1: Body parts expected to develop MSDs [48]**

|     |                                                                                                                 |                                                                             |                                                                                                                                                               |
|-----|-----------------------------------------------------------------------------------------------------------------|-----------------------------------------------------------------------------|---------------------------------------------------------------------------------------------------------------------------------------------------------------|
| MS1 | Have you at any time during The last 12 months had pain or discomfort in any part of a Body?<br>1. No<br>2. Yes | Have you had trouble at Any time during the last 7 days?<br>1. No<br>2. Yes | Have you at any time during the last 12 Months been prevented from doing your normal work at home or at the workplace because of the pain?<br>1. No<br>2. Yes |
| MS2 | Neck<br>1. No<br>2. Yes                                                                                         | Neck<br>1. No<br>2. Yes                                                     | Neck<br>1. No<br>2. Yes                                                                                                                                       |
| MS3 | Shoulder<br>1. No<br>2. Yes in right Shoulder<br>3. Yes in left Shoulder<br>4. Yes on both Shoulders            | Shoulder<br>1. No<br>2. Yes                                                 | Shoulder<br>1. No<br>2. Yes                                                                                                                                   |
| MS4 | Elbow<br>1. No<br>2. Yes in right elbow<br>3. Yes in left elbow<br>4. Yes on both elbow                         | Elbow<br>1. No<br>2. Yes                                                    | Elbow<br>1. No<br>2. Yes                                                                                                                                      |
| MS5 | Wrist/hand<br>1.No<br>2.Yes in right wrist/hand<br>3.Yes in left wrist/hand<br>4.Yes on both wrist/hand         | Wrist/hand<br>1.No<br>2.Yes                                                 | Wrist/hand<br>1.No<br>2.Yes                                                                                                                                   |
| MS6 | Upper back<br>1.No                                                                                              | Upper back<br>1.No                                                          | Upper back<br>1.No                                                                                                                                            |

|      |                                                                                                        |                             |                             |
|------|--------------------------------------------------------------------------------------------------------|-----------------------------|-----------------------------|
|      | 2.Yes                                                                                                  | 2.Yes                       | 2.Yes                       |
| MS7  | Lower back<br>1.No<br>2.Yes                                                                            | Lower back<br>1.No<br>2.Yes | Lower back<br>1.No<br>2.Yes |
| MS8  | Hip/thigh<br>1.No<br>2. Yes in right Hip/thigh<br>3. Yes in left Hip/thigh<br>4. Yes On both Hip/thigh | Hip/thigh<br>1.No<br>2.Yes  | Hip/thigh<br>1.No<br>2.Yes  |
| MS9  | Knee<br>1.No<br>2. Yes in right knee<br>3. Yes in left knee<br>4. Yes On both knees                    | Knee<br>1.No<br>2.Yes       | Knee<br>1.No<br>2.Yes       |
| MS10 | Ankle<br>1.No<br>2. Yes in right ankle<br>3. Yes in left ankle<br>4. Yes On both ankles                | Ankle<br>1.No<br>2.Yes      | Ankle<br>1.No<br>2.Yes      |

**Part four: Clinical factors**

| Code | Response/recording           |                                                           |
|------|------------------------------|-----------------------------------------------------------|
| C1   | Stage of the disease?        | 1. First<br>2. Second<br>3. Third<br>4. Forth<br>5. Fifth |
| C2   | Are you taking Hemodialysis? | 1. No<br>2. Yes<br>If you say NO, skip C3 and C4          |
| C3   | Duration of Hemodialysis     | .....Month/year                                           |
| C4   | CRP                          | ≤ 5 mg/dL                                                 |
|      |                              | > 5 mg/dL                                                 |

**Comorbidities related questions?**

C1.Do you have or have had any of the following diseases?

| Disease           | NO | Yes |
|-------------------|----|-----|
| diabetes mellitus |    |     |
| Hypertension      |    |     |

|                |  |  |
|----------------|--|--|
| Heart diseases |  |  |
| Hyperuricemia  |  |  |

**Part five: HEALTH ASSESSMENT QUESTIONNAIRE (HAQ-DI)**

Please place an “x” in the box which best describes your abilities OVER THE PAST WEEK:

**DRESSING & GROOMING**

WITHOUT ANY DIFFICULTY      WITH SOME DIFFICULTY      WITH MUCH DIFFICULTY      UNABLE TO DO

Are you able to:

Dress yourself, including shoelaces and buttons?                                                                     

Shampoo your hair?                                                                     

**ARISING**

Are you able to:

Stand up from a straight chair?                                                                     

Get in and out of bed?                                                                     

**EATING**

Are you able to

Cut your own meat?                                                                     

Lift a full cup or glass to your mouth?

Open a new milk carton?

**WALKING**

**Are you able to:**

Walk outdoors on flat ground?

Climb up five steps?

**Please check any AIDS OR DEVICES that you usually use for any of the above activities:**

Devices used for Dressing  
(button hook, zipper pull,  
etc.)

Built up or special utensils

Crutches

Cane

Wheelchair

Special or built up chair

Walker

**Please check any categories for which you usually need HELP FROM ANOTHER PERSON:**

Dressing and grooming

Arising

Eating

Walking

Please place an "x" in the box which best describes your abilities OVER THE PAST WEEK:

WITHOUT ANY  
DIFFICULTY      WITH SOME  
DIFFICULTY      WITH MUCH  
DIFFICULTY      UNABLE  
TO DO

**HYGIENE**

Are you able to:

- |                            |                          |                          |                          |                          |
|----------------------------|--------------------------|--------------------------|--------------------------|--------------------------|
| Wash and dry your body?    | <input type="checkbox"/> | <input type="checkbox"/> | <input type="checkbox"/> | <input type="checkbox"/> |
| Take a tub bath?           | <input type="checkbox"/> | <input type="checkbox"/> | <input type="checkbox"/> | <input type="checkbox"/> |
| Get on and off the toilet? | <input type="checkbox"/> | <input type="checkbox"/> | <input type="checkbox"/> | <input type="checkbox"/> |

**REACH**

Are you able to:

- |                                                                                    |                          |                          |                          |                          |
|------------------------------------------------------------------------------------|--------------------------|--------------------------|--------------------------|--------------------------|
| Reach and get down a 5 pound object (such as a bag of sugar) from above your head? | <input type="checkbox"/> | <input type="checkbox"/> | <input type="checkbox"/> | <input type="checkbox"/> |
| Bend down to pick up clothing from the floor?                                      | <input type="checkbox"/> | <input type="checkbox"/> | <input type="checkbox"/> | <input type="checkbox"/> |

**GRIP**

Are you able to:

- |                              |                          |                          |                          |                          |
|------------------------------|--------------------------|--------------------------|--------------------------|--------------------------|
| Open car doors?              | <input type="checkbox"/> | <input type="checkbox"/> | <input type="checkbox"/> | <input type="checkbox"/> |
| Open previously opened jars? | <input type="checkbox"/> | <input type="checkbox"/> | <input type="checkbox"/> | <input type="checkbox"/> |
| Turn faucets on and off?     | <input type="checkbox"/> | <input type="checkbox"/> | <input type="checkbox"/> | <input type="checkbox"/> |

**ACTIVITIES**

**Are you able to?**

Run errands and shop?

Get in and out of a car?

Do chores such as vacuuming or yard work?

**Please check any AIDS OR DEVICES that you usually use for any of the above activities:**

Raised toilet seat

Bathtub bar

Long-handled appliances for reach

Bathtub seat

Long-handled appliances  
in bathroom

Jar opener (for jars previously opened)

**Please check any categories for which you usually need HELP FROM ANOTHER PERSON:**

Hygiene

Reach

Gripping and opening things

Errands and chores

**Your ACTIVITIES:** To what extent are you able to carry out your everyday physical activities such as walking, climbing stairs, carrying groceries, or moving a chair?

COMPLETELY      MOSTLY      MODERATELY      A LITTLE      NOT AT ALL

                                                                                      

**Your PAIN:** How much pain have you had IN THE PAST WEEK?

On a scale of 0 to 100 (where zero represents “no pain” and 100 represents “severe pain”), please record the number below.

|  |  |  |
|--|--|--|
|  |  |  |
|--|--|--|

**Your HEALTH:** Please rate how well you are doing on a scale of 0 to 100 (0 represents “very well” and 100 represents “very poor” health), please record the number below.

|  |  |  |
|--|--|--|
|  |  |  |
|--|--|--|

**Thank you for your time and participation**
